# Supplementary material
Source: MDPI journal article supplement (https://www.mdpi.com/2073-4395/10/1/127)
Supplement: s1 [file s1]

**Supplemental Table S1.** Effect of salinity on plant growth and biomass of Suntop, Sunmate and CM72 25 days after treatment with 100 mM NaCl.

| Genotype | Treatment | SH    |        | RL    |     | SFW           |     | RFW           |     | SDW           |     | RDW           |     |
|----------|-----------|-------|--------|-------|-----|---------------|-----|---------------|-----|---------------|-----|---------------|-----|
|          |           | (cm)  | (%Red) | (cm)  |     | (g per plant) |     |
| Suntop   | Control   | 40.1b |        | 40.9b |     | 1.8a          |     | 0.56a         |     | 0.21a         |     | 0.07a         |     |
|          | NaCl      | 35.4c | -12    | 37.5c | -8  | 0.8b          | -55 | 0.38c         | -33 | 0.09c         | -53 | 0.04c         | -39 |
| Sunmate  | Control   | 42.7a |        | 45.8a |     | 1.9a          |     | 0.53a         |     | 0.22a         |     | 0.06b         |     |
|          | NaCl      | 30.3d | -30    | 28.9e | -37 | 0.6c          | -68 | 0.31d         | -42 | 0.07d         | -68 | 0.02d         | -56 |
| CM72     | Control   | 39.3b |        | 40.6b |     | 1.8a          |     | 0.46b         |     | 0.19b         |     | 0.05c         |     |
|          | NaCl      | 34.2c | -13    | 32.7d | -24 | 0.7b          | -59 | 0.41c         | -11 | 0.09c         | -49 | 0.03d         | -30 |

Different letters indicate significant differences ( $P \leq 0.05$ ) between treatments within the 3 cultivars (n=4). % red, reduced percentage (%) of control; SH, shoot height; RL, root length; SFW, shoot fresh weight; RFW, root fresh weight; SDW, shoot dry weight; RDW, root dry weight.

**Supplemental Table S2.** Shoot and root Na<sup>+</sup> and K<sup>+</sup> concentration and Na<sup>+</sup>/K<sup>+</sup> ratio of two wheat *cvv.*, Suntop and Sunmate, and one barley *cv.*, CM72, 25 days after treatment with 100 mM NaCl.

| Genotype            | Treatment   | Na <sup>+</sup> (mg g <sup>-1</sup> DW) | K <sup>+</sup> (mg g <sup>-1</sup> DW) | Na <sup>+</sup> /K <sup>+</sup> ratio |
|---------------------|-------------|-----------------------------------------|----------------------------------------|---------------------------------------|
| <b><u>Shoot</u></b> |             |                                         |                                        |                                       |
| Suntop              | Control     | 0.419d                                  | 26.739a                                | 0.016c                                |
|                     | 100 mM NaCl | 0.771b                                  | 5.978d                                 | 0.127b                                |
| Sunmate             | Control     | 0.332e                                  | 25.893a                                | 0.013c                                |
|                     | 100 mM NaCl | 0.950a                                  | 2.863e                                 | 0.339a                                |
| CM72                | Control     | 0.272f                                  | 18.413b                                | 0.015c                                |
|                     | 100 mM NaCl | 0.663c                                  | 8.740c                                 | 0.075b                                |
| <b><u>Root</u></b>  |             |                                         |                                        |                                       |
| Suntop              | Control     | 32.398d                                 | 47.846b                                | 0.679c                                |
|                     | 100 mM NaCl | 50.614b                                 | 12.422d                                | 4.096b                                |
| Sunmate             | Control     | 10.388f                                 | 47.589b                                | 0.218c                                |
|                     | 100 mM NaCl | 67.625a                                 | 4.380e                                 | 15.566a                               |
| CM72                | Control     | 25.057e                                 | 74.404a                                | 0.339c                                |
|                     | 100 mM NaCl | 37.825c                                 | 27.321c                                | 1.390c                                |

Data were means of five independent replications. Different letters indicate significant differences ( $P \leq 0.05$ ) among the treatments and within the 3 cultivars.

**Supplemental Table S3.** Effect of salinity stress on SOD, POD, CAT, APX and GR activities and MDA contents in the shoots of Suntop, Sunmate and CM72 1, 5, 10, and 15 days after treatment with 100 mM NaCl.

| Genotype      | Treatment | SOD<br>(U g <sup>-1</sup> FW) | POD<br>(OD470 g <sup>-1</sup> min <sup>-1</sup> ) | CAT<br>(mmol g <sup>-1</sup> FW min <sup>-1</sup> ) | APX<br>(mmol g <sup>-1</sup> FW min <sup>-1</sup> ) | GR<br>(mmol g <sup>-1</sup> FW min <sup>-1</sup> ) | MDA<br>(nmol g <sup>-1</sup> FW) |
|---------------|-----------|-------------------------------|---------------------------------------------------|-----------------------------------------------------|-----------------------------------------------------|----------------------------------------------------|----------------------------------|
| <b>Day 1</b>  |           |                               |                                                   |                                                     |                                                     |                                                    |                                  |
| Suntop        | Control   | 192.2e                        | 2.4d                                              | 3.6d                                                | 167.6e                                              | 3.9e                                               | 9.6e                             |
|               | Na        | 315.6a                        | 3.9b                                              | 7.9a                                                | 209.7a                                              | 6.6a                                               | 12.9c                            |
| Sunmate       | Control   | 215.8d                        | 2.7d                                              | 3.2e                                                | 179d                                                | 4.1d                                               | 11.1d                            |
|               | Na        | 260.8c                        | 3.3c                                              | 4.7c                                                | 193.2c                                              | 5.2c                                               | 24.4a                            |
| CM72          | Control   | 219.5d                        | 2.5d                                              | 3.8d                                                | 178.2d                                              | 4.2d                                               | 11.2d                            |
|               | Na        | 280.8b                        | 4.7a                                              | 6.3 b                                               | 200.1b                                              | 6b                                                 | 14.8b                            |
| <b>Day 5</b>  |           |                               |                                                   |                                                     |                                                     |                                                    |                                  |
| Suntop        | Control   | 220e                          | 2.6d                                              | 6.5d                                                | 159c                                                | 4.2d                                               | 11.8f                            |
|               | Na        | 307.4b                        | 6.8a                                              | 13b                                                 | 194.7a                                              | 5.9b                                               | 17.3c                            |
| Sunmate       | Control   | 258.5d                        | 2.8d                                              | 7.2c                                                | 158.3c                                              | 4.3d                                               | 14.3d                            |
|               | Na        | 283.6c                        | 3.5c                                              | 12.6b                                               | 177.7b                                              | 5.2c                                               | 26.2a                            |
| Cm72          | Control   | 258.2d                        | 2.3e                                              | 6.4d                                                | 154.7c                                              | 4d                                                 | 13.3e                            |
|               | Na        | 324.6a                        | 5.1b                                              | 14.6a                                               | 187.6a                                              | 8.2a                                               | 19.4b                            |
| <b>Day 10</b> |           |                               |                                                   |                                                     |                                                     |                                                    |                                  |
| Suntop        | Control   | 67.4d                         | 2.7d                                              | 5.5cd                                               | 12.4d                                               | 4.1d                                               | 8.9d                             |
|               | Na        | 178.3a                        | 5.7a                                              | 8.7a                                                | 18.4b                                               | 5.4b                                               | 13.5b                            |
| Sunmate       | Control   | 82.4c                         | 2.9cd                                             | 6c                                                  | 15.3c                                               | 4.2d                                               | 9.2d                             |
|               | Na        | 155.1b                        | 4.2b                                              | 7b                                                  | 16.9b                                               | 4.9c                                               | 18.9a                            |
| CM72          | Control   | 77.2c                         | 3c                                                | 5.3d                                                | 11.3d                                               | 4.1d                                               | 8.9d                             |
|               | Na        | 176.4a                        | 5.9a                                              | 7.4b                                                | 22.1a                                               | 7.9a                                               | 10.6c                            |
| <b>Day 15</b> |           |                               |                                                   |                                                     |                                                     |                                                    |                                  |
| Suntop        | Control   | 66b                           | 1.9e                                              | 2.4d                                                | 32.5de                                              | 3.5c                                               | 10.7d                            |
|               | Na        | 78.6a                         | 3.1a                                              | 4.7a                                                | 94.8a                                               | 5.7a                                               | 19.4b                            |
| Sunmate       | Control   | 58.7c                         | 2.1d                                              | 2.6d                                                | 35.5d                                               | 3.6c                                               | 6.4f                             |
|               | Na        | 64.5b                         | 2.7b                                              | 3.4bc                                               | 62.4c                                               | 4.8b                                               | 22.2a                            |
| CM72          | Control   | 62.1bc                        | 1.7e                                              | 2.6d                                                | 31.2e                                               | 3.6c                                               | 8.7e                             |
|               | Na        | 75.1a                         | 2.4c                                              | 3.8b                                                | 74.9b                                               | 5b                                                 | 12.4c                            |
|               | Na        | 50.9a                         | 3.5b                                              | 2.7b                                                | 76a                                                 | 3b                                                 | 15b                              |

**Supplemental Table S4.** Effect of salinity stress on SOD, POD, CAT, APX and GR activities and MDA contents in roots of Suntop, Sunmate and CM72 1, 5, 10, and 15 days after treatment with 100mM NaCl.

| Genotype      | Treatment | SOD<br>(U g <sup>-1</sup> FW) | POD<br>(OD470 g <sup>-1</sup> min <sup>-1</sup> ) | CAT<br>(mmolg <sup>-1</sup> FW min <sup>-1</sup> ) | APX<br>(mmolg <sup>-1</sup> FW min <sup>-1</sup> ) | GR<br>(mmolg <sup>-1</sup> FW min <sup>-1</sup> ) | MDA<br>(nmol g <sup>-1</sup> FW) |
|---------------|-----------|-------------------------------|---------------------------------------------------|----------------------------------------------------|----------------------------------------------------|---------------------------------------------------|----------------------------------|
| <b>Day 1</b>  |           |                               |                                                   |                                                    |                                                    |                                                   |                                  |
| Suntop        | Control   | 166.2e                        | 3.9e                                              | 1.7d                                               | 160.5d                                             | 2d                                                | 5.1e                             |
|               | Na        | 224.4b                        | 7b                                                | 3.8a                                               | 193a                                               | 3.8b                                              | 9.9b                             |
| Sunmate       | Control   | 177.8de                       | 3.9e                                              | 1.6e                                               | 171.1c                                             | 2.4d                                              | 5.9d                             |
|               | Na        | 209.4c                        | 5.6c                                              | 2.5c                                               | 182b                                               | 3.1c                                              | 15.5a                            |
| CM72          | Control   | 183.4d                        | 4.8d                                              | 1.3f                                               | 169.1c                                             | 2.2d                                              | 8.1c                             |
|               | Na        | 295.4a                        | 7.5a                                              | 2.9b                                               | 197.9a                                             | 5.9a                                              | 10.4b                            |
| <b>Day 5</b>  |           |                               |                                                   |                                                    |                                                    |                                                   |                                  |
| Suntop        | Control   | 172.8cd                       | 7.8d                                              | 1.9f                                               | 147.2c                                             | 1.3e                                              | 3.5e                             |
|               | Na        | 196.8a                        | 14.1a                                             | 4.4b                                               | 175.3a                                             | 3.4a                                              | 8.7b                             |
| Sunmate       | Control   | 164.5d                        | 9.2c                                              | 2.9d                                               | 148.3c                                             | 1.6d                                              | 4.9d                             |
|               | Na        | 178.1bc                       | 10.4b                                             | 4c                                                 | 160.7b                                             | 2.4c                                              | 13.8a                            |
| CM72          | Control   | 169.7cd                       | 8.1d                                              | 2.4e                                               | 135.4d                                             | 1.2e                                              | 5.1d                             |
|               | Na        | 188.7ab                       | 13.8a                                             | 5.4a                                               | 174.3a                                             | 2.6b                                              | 6.8c                             |
| <b>Day 10</b> |           |                               |                                                   |                                                    |                                                    |                                                   |                                  |
| Suntop        | Control   | 30.3c                         | 1.7d                                              | 1.1c                                               | 11.5e                                              | 2.6d                                              | 5.8e                             |
|               | Na        | 53.6a                         | 3.8a                                              | 2.3a                                               | 20.5b                                              | 5.9a                                              | 14.6b                            |
| Sunmate       | Control   | 35.8c                         | 1.8d                                              | 1c                                                 | 12.8de                                             | 2.4d                                              | 6.1e                             |
|               | Na        | 42.1b                         | 2.9c                                              | 1.8b                                               | 17.5c                                              | 4.9c                                              | 28.1a                            |
| CM72          | Control   | 35.8c                         | 1.6d                                              | 1.2c                                               | 15cd                                               | 2.5d                                              | 7.2d                             |
|               | Na        | 52.1a                         | 3.6b                                              | 2.4a                                               | 29.9a                                              | 5.2b                                              | 10.7c                            |
| <b>Day 15</b> |           |                               |                                                   |                                                    |                                                    |                                                   |                                  |
| Suntop        | Control   | 24.1d                         | 2.5d                                              | 1.6d                                               | 46.9de                                             | 1.7e                                              | 5.1e                             |
|               | Na        | 43.3b                         | 3.8a                                              | 2.9a                                               | 69.8b                                              | 3.4a                                              | 9.4c                             |
| Sunmate       | Control   | 25.8d                         | 2.5d                                              | 1.6d                                               | 49.8d                                              | 1.9d                                              | 5.9de                            |
|               | Na        | 34.4c                         | 3c                                                | 1.9c                                               | 60.2c                                              | 2.7c                                              | 18.1a                            |
| CM72          | Control   | 26.9d                         | 2e                                                | 1.4e                                               | 44.1e                                              | 1.1f                                              | 6.4d                             |
|               | Na        | 50.9a                         | 3.5b                                              | 2.7b                                               | 76a                                                | 3b                                                | 15b                              |
